# Supplementary material
Source: MDPI journal article supplement (https://www.mdpi.com/2076-3298/10/12/223)
Supplement: s1 [file s1]

# Fugitive Dust Associated with Scrap Metal Processing

Jeff Gearhart, Simone Sagovac, Tian Xia, Md Kamrul Islam, Albert Shim, Sung-Hee Seo,  
Melissa Cooper Sargent, Natalie R. Sampson, Jacob Napieralski, Ika Danielson and Stuart Batterman

## Normalization of XRF measurements

Accurate XRF measurements require that samples completely fill the XRF sensing field (both aperture and depth). This condition may be unmet by wipe samples considering the small amount of dust collected. Significant and positive correlation between sample weight and elemental measurements (in ppm; Spearman rank correlation coefficients from 0.50 to 0.66 for Ca, Cr, Cu, Fe, K, Mn, Ni, Ti and Zn) demonstrate this concern, showing that concentrations were not independent of sample weight. This was not a concern for the soil samples, which completely filled the sample cassette.

Several approaches might be used to normalize the XRF data. First, dividing by sample weight would express concentration in unusual units (e.g., ppm/g or  $\mu\text{g/g}^2$ ) and remains unlikely to fully compensate for loading effects. Moreover, sample weights were unavailable for 9 samples, and low sample weights (below ~20 mg) were uncertain given the variation in the tare weight. Second, dividing by the sampled area (giving  $\mu\text{g/g}\cdot\text{cm}^2$ ) might be useful if areas were similar, but this was not always the case. Third, XRF data might be normalized to a common element (e.g., Al, Ca, Fe or Si). However, levels of these elements were variable, especially in the wipe samples as many samples did not resemble native or natural soils (discussed later). We propose a fourth approach, normalizing by the reconstructed mass (RM), calculated as the sum of the common oxidized form of minerals based on XRF measurements. The RM often is used to provide a quality check and the mass estimate for speciated air samples (Chow et al., 2015). This has the advantage over the third approach of utilizing all XRF data and not depending on a single elemental measurement. A recommended RM equation is:

$$\text{RM} = \text{reconstructed mass} = 2.2 \text{ Al} + 1.63 \text{ Ca} + 2.42 \text{ Fe} + 2.49 \text{ Si} + 1.94 \text{ Ti} + \sum_i \text{E}_i \quad (1)$$

where Al, Ca, Fe, Si and Ti are XRF measurements for these elements (ppm),  $\text{E}_i$  are other XRF measurements (ppm), and the coefficients represent stoichiometric ratios for the main oxidized form. Across the wipe samples, RM averaged only 37,800 ppm (range: 1,200 to 159,900). Each XRF determination was divided by sample's RM, forming the reconstructed mass fraction for each element  $\text{F}_{\text{E}_i}$  (dimensionless, e.g., g/g):

$$\text{F}_{\text{E}_i} = \text{E}_i / \text{RM} \quad (2)$$

Finally, summing across elements gives the weight fraction of measured constituents, called  $\Sigma_{\text{F}}$  (dimensionless):

$$\Sigma_{\text{F}} = \sum_i \text{F}_{\text{E}_i} \quad (3)$$

RM and  $\Sigma_{\text{F}}$  were computed for each sample.  $\Sigma_{\text{F}}$  did not vary significantly by the type of wipe sample, e.g.,  $\Sigma_{\text{F}}$  averaged 0.498 (N=17) for window samples, 0.478 (N=15) for painted surfaces, and 0.474 (N=13) for other wipe samples. The missing fraction ( $1 - \Sigma_{\text{F}}$ ) likely is various forms of carbon (elemental and organic) and elements below the limit of detection. As expected,  $\Sigma_{\text{F}}$  was higher, 0.707, for the soil and road dust samples (N=20) that were likely to contain less carbon. While not reaching unity (i.e., accounting for 100% of the composition),  $\Sigma_{\text{F}}$  was considerably higher than sum of the XRF measurements.  $\Sigma_{\text{F}}$  had slight negative correlation with sample weight and no strong trend. Importantly, using  $\text{F}_{\text{E}_i}$  instead of the direct measurement  $\text{E}_i$  nearly halved the variation of measurements for each element with the exception of Cu, however, removing a single Cu data point gave

a comparable reduction. (The outlier was sample R34, a wipe sample collected on a fire hydrant that had the highest levels of Cu, Fe and Zn among wipe samples.) Further, correlations and other statistics were considerably more consistent using  $Fe_i$ , e.g., pairs of metals such as Cu and Zn, Mn and Ni, Fe and Mn, and Fe and Ni were strongly correlated, as expected. A final advantage is that both wipe and soil/dust samples can use this normalization, thus allowing for direct comparison. For these reasons, normalization by reconstructed mass appears beneficial, although biases are possible if the mass fraction of an element used to identify a source was both strongly correlated to the RM and constituted a large fraction of the mass (e.g.,  $\geq 30\%$ ). Spearman correlation coefficients between mass fractions and reconstructed mass were low with the exception of Ni ( $R=0.58$ ). Because metals of most interest had small mass fractions ( $<0.001$ ) except for Fe (described in the text), bias seems unlikely.

### Ambient PM measurements by MPAL

The Michigan Pollution Assessment Laboratory (MPAL) is a mobile air quality monitoring platform that measures various particulate matter and gaseous air pollutants. The Horiba PX-375 (Horiba, Kyoto, Japan) installed onboard measures 1-minute  $PM_{10}$  using  $\beta$ -attenuation; and 30-minute  $PM_{10}$  metals and other elements, including Ti, V, Cr, Mn, Fe, Ni, Cu, Zn, As, Pb, Al, Si, S, K, and Ca, using X-ray fluorescence (XRF) spectrometry. In addition to Horiba data, this study examined the 1-min  $PM_{10}$  measured by another onboard instrument, the optical particle sizer (OPS, TSI 3330, TSI Inc., Shoreview, MN, USA), and the wind direction and speed measured by MPAL's weather station (Young 92000, R.M. Young Company, Traverse City, MI, USA). MPAL was parked on Kaier Street opposite the metal processor on two days for three 30-min sampling periods (Table S2). While parked, the onboard rear-facing wide-angle camera (Spy Tec Mobius action camera) took time-lapse photos for every 2 s, which captured the traffic on Dearborn Street and the gate to the metal processor facility. The photos were reviewed to estimate the number of trucks traveled on Dearborn Street and among them, the number of trucks entering the facility.

In the three 30-min periods, the wind direction was SW to WSW, and the wind speed was relatively low (0.9 – 2.5 m/s). On 8/16/2019 a total of 53 trucks traveled on Dearborn Street over one hour, while on 2/14/2020, only 17 trucks were seen in 30 minutes. The number of trucks entering the facility was similar, about 12 trucks/hr.

Elevated  $PM_{10}$  was observed on 8/16/2019 but not on 2/14/2020, possibly due to the fewer traffic and wet ground surface (after snow) on 2/14/2020. Figure S5 shows that, after 40-min forward adjustment,  $PM_{10}$  measured by the Horiba had similar trends as compared to the OPC data, while the OPC were more sensitive, and the peak values were 5 – 10 times larger.

Fe concentration varied 0.6 – 5.4  $\mu\text{g}/\text{m}^3$  over the three 30-min period (Table S2), and the measurements over the entire sampling days were tabulated in Table S3. If a 30-min forward adjustment is applied, Fe concentration was consistently at  $\sim 1 \mu\text{g}/\text{m}^3$  on 8/16/2019 and 0.3  $\mu\text{g}/\text{m}^3$  on 2/14/2020. The detected Fe may be from the metal processor, but could also be from a large construction site, as a larger peak was always detected near the construction site right before the parking period. The second peak on 2/14/2020 (14:00 – 15:00) was detected near the Dearborn monitoring site, which agreed with the site data analysis in Table S1.

In summary, the ambient measurements by MPAL detected elevated  $PM_{10}$  and Fe in southwest Detroit. Potential sources of Fe in  $PM_{10}$  include a large construction site, the metal processing facility, and the steel mill and other industries near the Dearborn monitoring site. Longer and systematic sampling by MPAL at these locations is needed to have a representative source estimation.

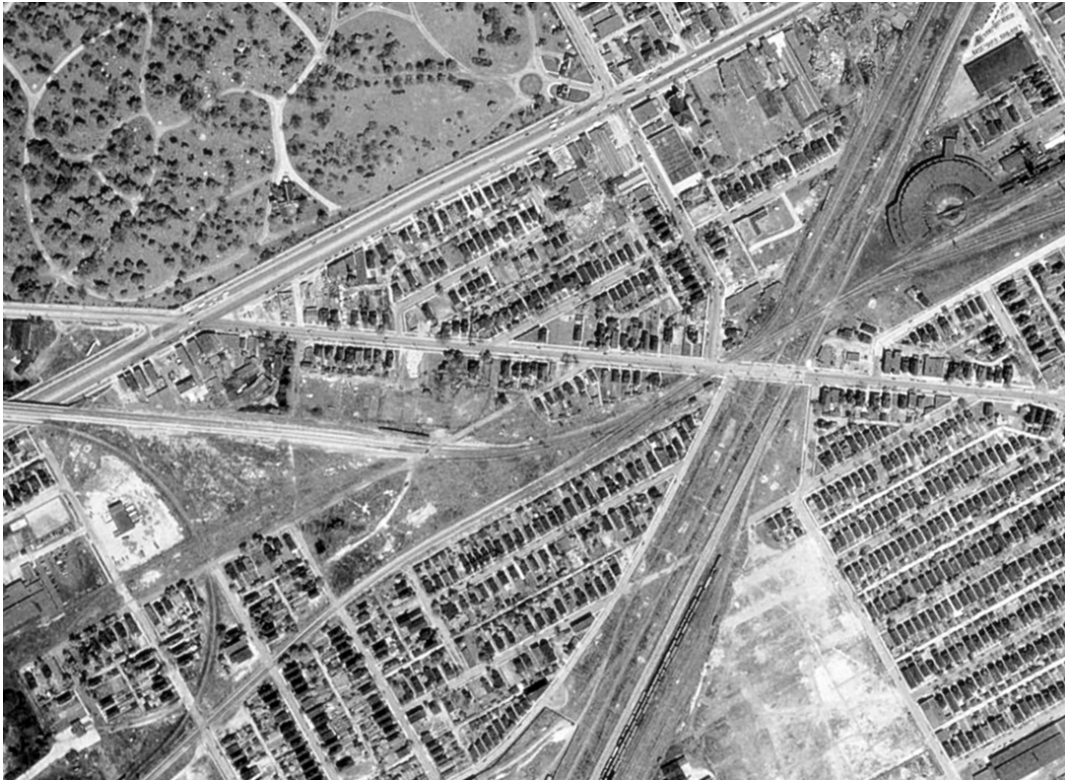

**Figure S1.** 1949 aerial view of processor. Note homes line south side of Dearborn street and only the western portion of the property appears to be industrial. From [https://digital.library.wayne.edu/dte\\_aerial/part2/wayne/1949/ha-18-99.pdf](https://digital.library.wayne.edu/dte_aerial/part2/wayne/1949/ha-18-99.pdf).

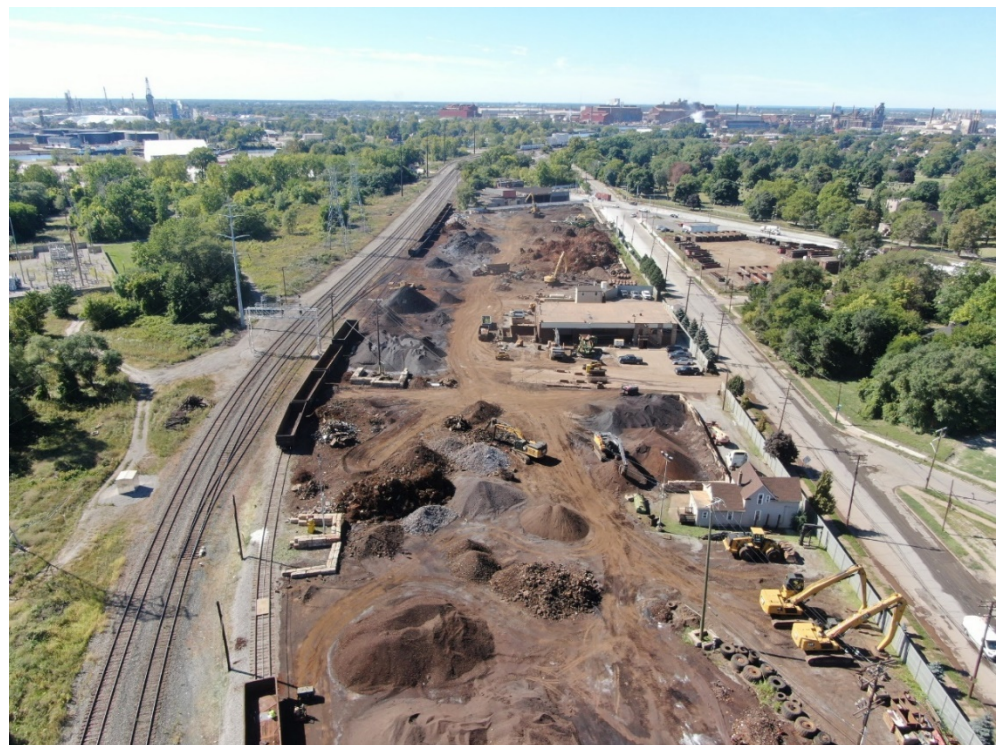



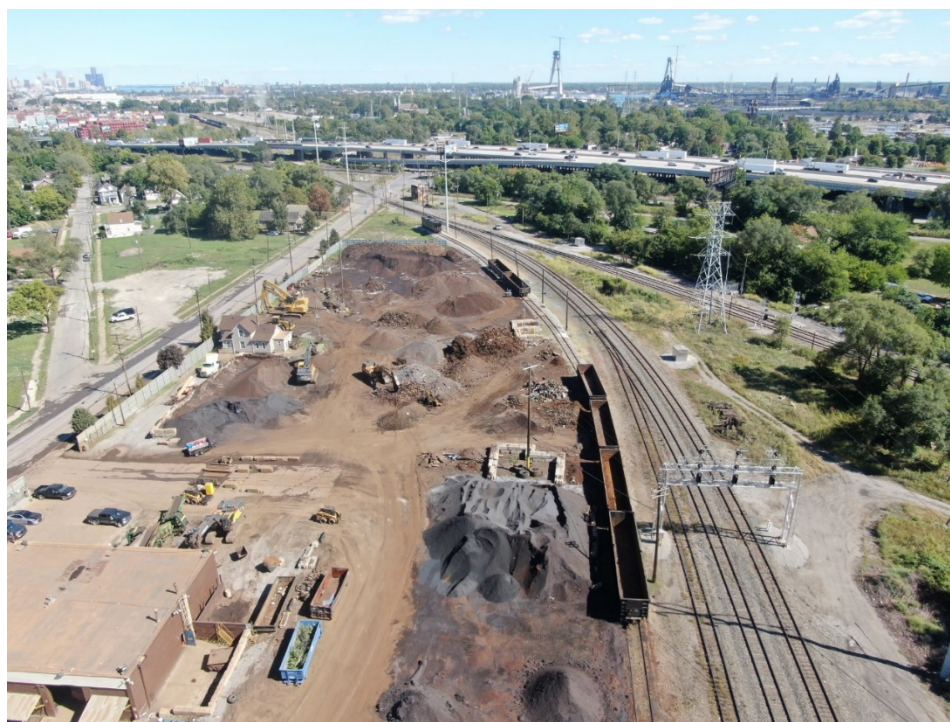

**Figure S2.** Photos showing arial view of facility. Top: Looking west. Bottom: Looking East.

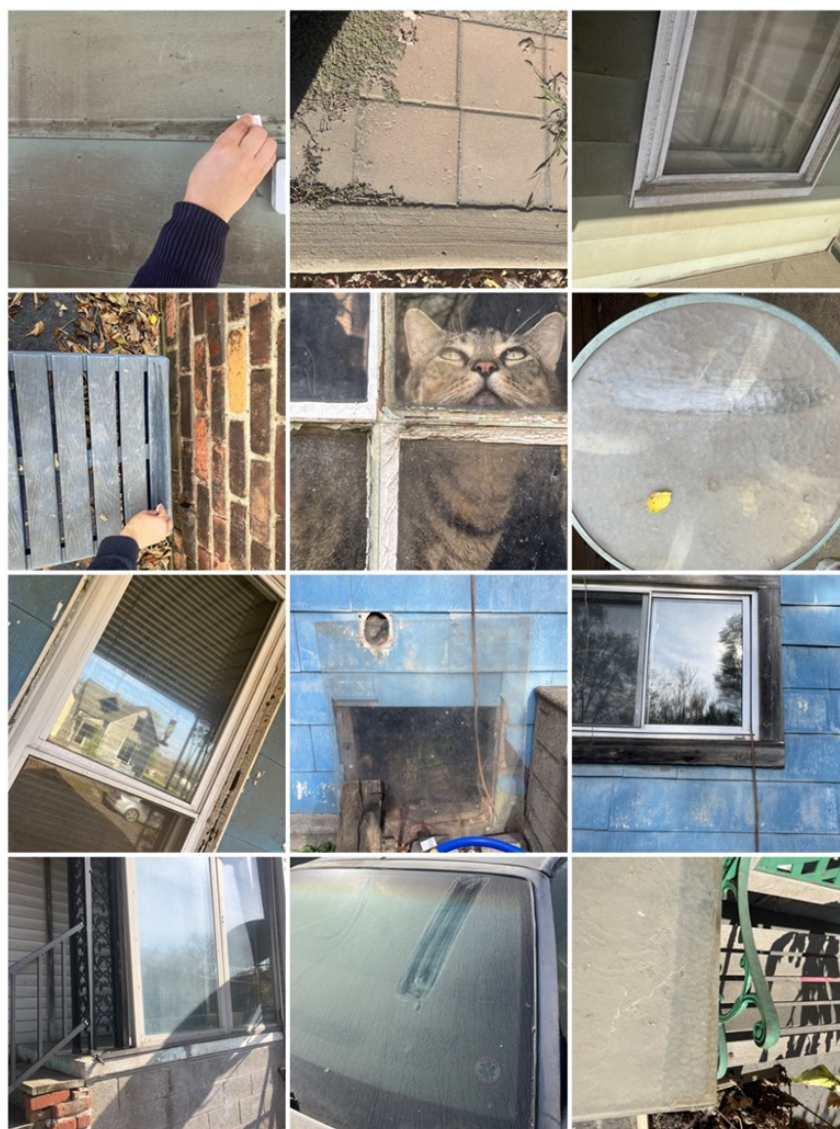

**Figure S3.** Photos showing examples of wipe sampling locations. 1<sup>st</sup> row: Porch, tile and window sampling along Dearborn Street. 2<sup>nd</sup> row: plastic table, window and glass table in Kaier Street area. 3<sup>rd</sup> row: window, plexiglass sheet and back yard window on Graham Street area. 4<sup>th</sup> row: window, car windshield and glass plate in Graham Street area.

The figures suggest that relative to ambient TSP, soils and dusts are enriched in Cu and Zn (and Pb and Mn for the source area) compared to the other elements (e.g., Fe, Mn, Cr). This analysis has limitations: the TSP metals were collected at a different site; only a subset of metals are included in the TSP measurements; only 2021 data are used for the TSP. Similar analyses for PM<sub>10</sub> and PM<sub>2.5</sub> show considerably more scatter, indicating greater variation between metal compositions in dusts/soils and ambient air for the smaller size fraction. This is consistent with soils and dusts reflecting primarily dust fall of larger particles.

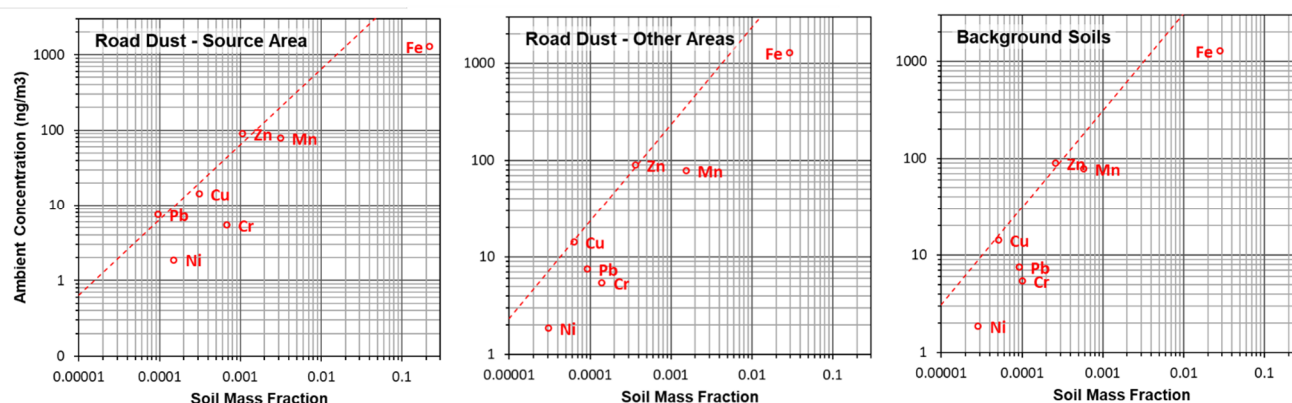

**Figure S4.** Comparison of ambient concentrations of available metals in TSP at the Dearborn monitoring site (annual average for 2021) to soil/dust mass fractions for road dust in the source area, road dust in other areas, and background soils. Line shows average ratio between TSP concentration and soil/dust mass fraction for Cu and Zn, which is 64196, 232865, and 306492 for the three figures (from left to right). Equal ratios would lay on lines parallel to that displayed. .

**Table S1.** Annual average concentrations of selected elements (ng/m<sup>3</sup>) and PM (μg/m<sup>3</sup>) in ambient air in three size fractions at local monitoring sites for 2021. Sites are Trinity St. Marks, New Mount Herman, Military Park, Southwest High School, Dearborn, Detroit Precinct 4, and River Rouge. From US EPA Air Data Air Quality Monitors, <https://epa.maps.arcgis.com/apps/webappviewer>.

| Element | TSP  |      |       |      |        |      |        | PM10 |     |       |      |       |     |        | PM2.5 |     |       |       |       |      |        |
|---------|------|------|-------|------|--------|------|--------|------|-----|-------|------|-------|-----|--------|-------|-----|-------|-------|-------|------|--------|
|         | TRIN | NMH  | MPARK | SWHS | DB     | DP4  | RIVERR | TRIN | NMH | MPARK | SWHS | DB    | DP4 | RIVERR | TRIN  | NMH | MPARK | SWHS  | DB    | DP4  | RIVERR |
| As      | 2.0  | 1.2  | 1.7   | 1.5  | 1.3    | 1.2  | 1.2    | -    | -   | -     | -    | 1.127 | -   | -      | -     | -   | -     | 0.0   | 0.0   | -    | -      |
| Cd      | 0.2  | 0.1  | 0.2   | 0.2  | 0.3    | 0.1  | 0.4    | -    | -   | -     | -    | 0.196 | -   | -      | -     | -   | -     | 0.6   | 0.8   | -    | -      |
| Al      | -    | -    | -     | -    | -      | -    | -      | -    | -   | -     | -    | -     | -   | -      | -     | -   | -     | 38.2  | 35.4  | -    | -      |
| Ca      | -    | -    | -     | -    | -      | -    | -      | -    | -   | -     | -    | -     | -   | -      | -     | -   | -     | 118.1 | 100.6 | -    | -      |
| Ce      | -    | -    | -     | -    | -      | -    | -      | -    | -   | -     | -    | -     | -   | -      | -     | -   | -     | 0.4   | 0.1   | -    | -      |
| Cr      | -    | -    | -     | -    | 5.4    | -    | -      | -    | -   | -     | -    | 3.3   | -   | -      | -     | -   | -     | 1.4   | 2.3   | -    | -      |
| Cu      | -    | -    | -     | -    | 14.1   | -    | -      | -    | -   | -     | -    | 14.0  | -   | -      | -     | -   | -     | 14.0  | 19.4  | -    | -      |
| Fe      | -    | -    | -     | -    | 1269.9 | -    | -      | -    | -   | -     | -    | 702.1 | -   | -      | -     | -   | -     | 111.0 | 249.4 | -    | -      |
| K       | -    | -    | -     | -    | -      | -    | -      | -    | -   | -     | -    | -     | -   | -      | -     | -   | -     | 66.1  | 86.3  | -    | -      |
| La      | -    | -    | -     | -    | -      | -    | -      | -    | -   | -     | -    | -     | -   | -      | -     | -   | -     | -     | -     | -    | -      |
| Mn      | 67.2 | 20.8 | 50.1  | 51.6 | 77.6   | 46.6 | 32.0   | -    | -   | -     | -    | 37.7  | -   | -      | -     | -   | -     | 3.6   | 5.4   | -    | -      |
| Ni      | 3.1  | 1.3  | 1.6   | 1.8  | 1.9    | 1.8  | 1.2    | -    | -   | -     | -    | 1.4   | -   | -      | -     | -   | -     | 0.5   | 1.0   | -    | -      |
| P       | -    | -    | -     | -    | -      | -    | -      | -    | -   | -     | -    | -     | -   | -      | -     | -   | -     | 0.2   | 0.1   | -    | -      |
| Pb      | 7.5  | 3.4  | 10.6  | 7.2  | 7.5    | 6.9  | 4.8    | -    | -   | -     | -    | 7.2   | -   | -      | -     | -   | -     | 2.8   | 3.3   | -    | -      |
| Rb      | -    | -    | -     | -    | -      | -    | -      | -    | -   | -     | -    | -     | -   | -      | -     | -   | -     | -     | -     | -    | -      |
| S       | -    | -    | -     | -    | -      | -    | -      | -    | -   | -     | -    | -     | -   | -      | -     | -   | -     | 422.5 | 449.7 | -    | -      |
| Si      | -    | -    | -     | -    | -      | -    | -      | -    | -   | -     | -    | -     | -   | -      | -     | -   | -     | 97.7  | 79.8  | -    | -      |
| Sr      | -    | -    | -     | -    | -      | -    | -      | -    | -   | -     | -    | -     | -   | -      | -     | -   | -     | 1.0   | 1.2   | -    | -      |
| Ti      | -    | -    | -     | -    | -      | -    | -      | -    | -   | -     | -    | -     | -   | -      | -     | -   | -     | 3.5   | 3.2   | -    | -      |
| Zn      | -    | -    | -     | -    | 88.9   | -    | -      | -    | -   | -     | -    | 69.6  | -   | -      | -     | -   | -     | 21.5  | 34.7  | -    | -      |
| PM      | -    | -    | -     | -    | -      | -    | -      | -    | -   | -     | 23.6 | 23.2  | -   | -      | 12.0  | 9.9 | 11.2  | 10.9  | 9.8   | 11.2 | -      |

**Table S2.** PM<sub>10</sub>, selected element, and other measurements by MPAL during the three 30-min periods. The number of trucks were estimated according to the time-lapse photos taken every 2 s by the onboard rear-facing wide-angle camera. Wind direction and speed were acquired by the onboard weather station.

| Date                                          | 8/16/2019 | 8/16/2019 | 2/14/2020 |
|-----------------------------------------------|-----------|-----------|-----------|
| Start                                         | 11:00     | 11:30     | 12:30     |
| End                                           | 11:30     | 12:00     | 13:00     |
| No. of trucks on Dearborn St.                 | 29        | 34        | 17        |
| No. of trucks entering the facility           | 6         | 7         | 5         |
| PM <sub>10</sub> _Horiba (µg/m <sup>3</sup> ) | 47.3      | 81.6      | 30.2      |
| PM <sub>10</sub> _OPC (µg/m <sup>3</sup> )    | 163.3     | 103.2     | 34.7      |
| Fe (µg/m <sup>3</sup> )                       | 5.4       | 1.0       | 0.6       |
| Si (µg/m <sup>3</sup> )                       | 1.3       | 0.8       | 0.5       |
| S (µg/m <sup>3</sup> )                        | 0.6       | 0.6       | -0.1      |
| Ca (µg/m <sup>3</sup> )                       | 2.4       | 0.7       | 0.6       |
| Wind Dir ( ° )                                | 245.4     | 233.0     | 267.2     |
| Wind Speed (m/s)                              | 1.9       | 0.9       | 2.5       |

**Table S3.** PM<sub>10</sub>, Fe and Ca concentrations measured by Horiba PX-375 over the entire sampling visits to Detroit on 8/16/2019 and 2/14/2020. The three 30-min periods when MPAL was parked near the metal processor were marked yellow.

| Date&Time       | PM <sub>10</sub> ( $\mu\text{g}/\text{m}^3$ ) | Fe( $\text{ng}/\text{m}^3$ ) | Ca( $\text{ng}/\text{m}^3$ ) |
|-----------------|-----------------------------------------------|------------------------------|------------------------------|
| 8/16/2019 9:00  | 13.3                                          | 559.1                        | 486.5                        |
| 8/16/2019 9:30  | 21.8                                          | 616.8                        | 852.0                        |
| 8/16/2019 10:00 | 20.0                                          | 1198.3                       | 2152.3                       |
| 8/16/2019 10:30 | 24.9                                          | 12057.4                      | 5255.5                       |
| 8/16/2019 11:00 | 47.3                                          | 5431.3                       | 2358.1                       |
| 8/16/2019 11:30 | 81.6                                          | 1005.8                       | 740.6                        |
| 8/16/2019 12:00 | 76.8                                          | 966.8                        | 945.2                        |
| 8/16/2019 12:30 | 44.2                                          | 1081.6                       | 1723.2                       |
| 8/16/2019 13:00 | 32.7                                          | 778.1                        | 1273.3                       |
| 8/16/2019 13:30 | 40.5                                          | 1529.4                       | 1627.4                       |
| 8/16/2019 14:00 | 39.8                                          | 801.8                        | 671.3                        |
| 2/14/2020 9:30  | 14.9                                          | 630.2                        | 1203.3                       |
| 2/14/2020 10:00 | 34.9                                          | 261.0                        | 346.9                        |
| 2/14/2020 10:30 | 48.6                                          | 319.5                        | 824.0                        |
| 2/14/2020 11:00 | 37.8                                          | 635.5                        | 1772.8                       |
| 2/14/2020 11:30 | 38.2                                          | 485.6                        | 846.7                        |
| 2/14/2020 12:00 | 41.3                                          | 1157.4                       | 887.3                        |
| 2/14/2020 12:30 | 30.2                                          | 555.2                        | 590.6                        |
| 2/14/2020 13:00 | 19.9                                          | 269.2                        | 292.7                        |
| 2/14/2020 13:30 | 15.7                                          | 481.2                        | 575.1                        |
| 2/14/2020 14:00 | 16.4                                          | 1873.9                       | 5171.7                       |
| 2/14/2020 14:30 | 28.0                                          | 1021.3                       | 3231.5                       |
| 2/14/2020 15:00 | 77.5                                          | 953.3                        | 2270.3                       |
| 2/14/2020 15:30 | 63.0                                          | 763.7                        | 1603.9                       |
| 2/14/2020 16:00 | 55.1                                          | 111.3                        | 226.3                        |
| 2/14/2020 16:30 | 37.0                                          | 46.2                         | -22.0                        |
| 2/14/2020 17:00 | 7.7                                           | 26.4                         | -135.6                       |



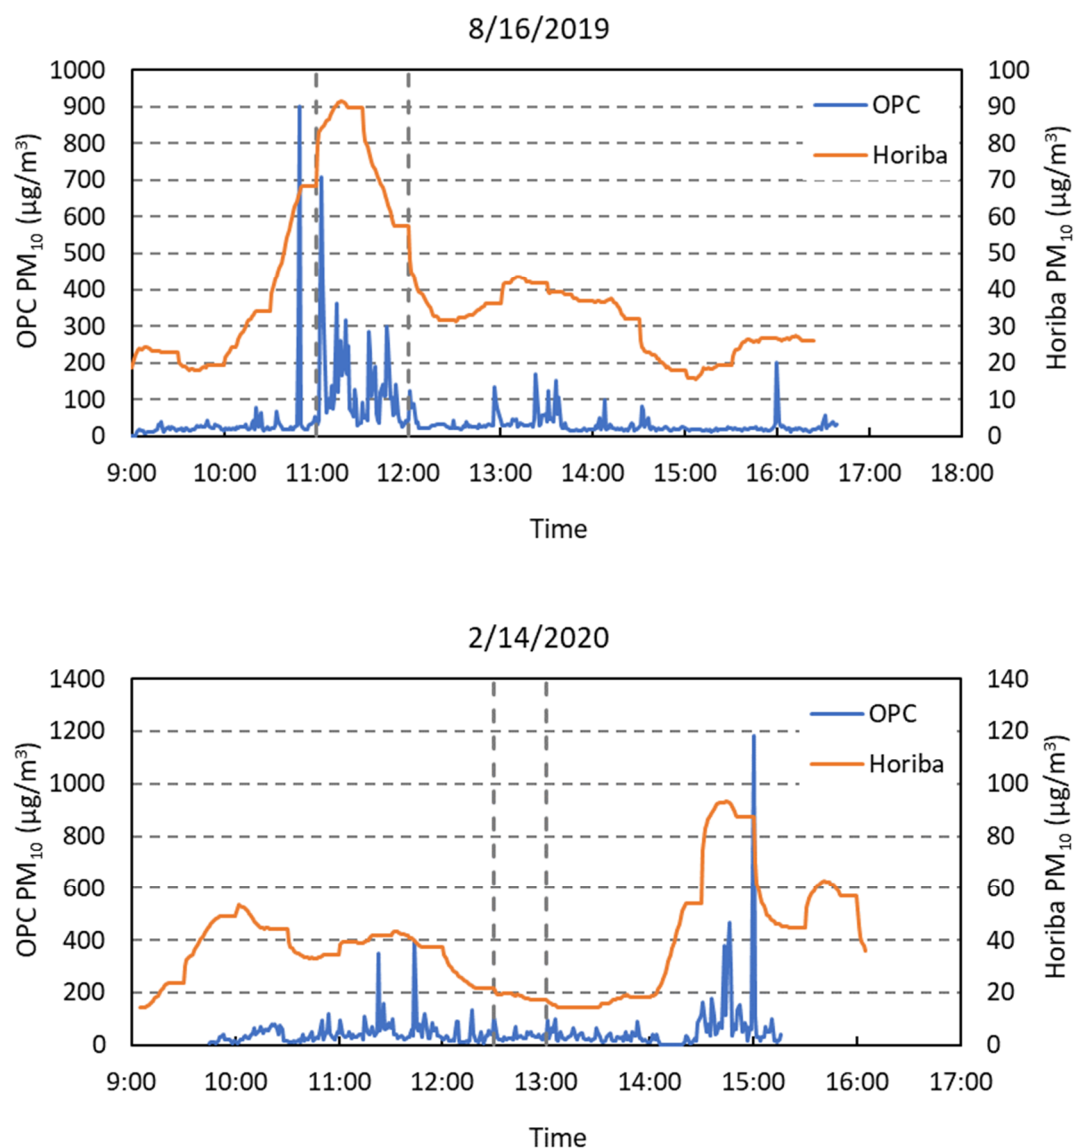

**Figure S5.** 1-minute PM<sub>10</sub> concentration trends measured by Horiba and OPC over the entire sampling visits to Detroit on 8/16/2019 and 2/14/2020. The three 30-min periods when MPAL was parked near the metal processor were marked between the two dashed vertical lines. Horiba data were adjusted forward by 40 minutes to match the trends with OPC.

**Table S4.** List of metal processing firms identified in Detroit. Continues on several pages.

| <b>Name of Business or shop</b>       | <b>Latitude Longitude</b>      |                               | <b>Category</b>                       | <b>Re-</b>          |
|---------------------------------------|--------------------------------|-------------------------------|---------------------------------------|---------------------|
| <b>duced Category</b>                 | <b>Address</b>                 | <b>City/Area</b>              | <b>State</b>                          | <b>ZIP</b>          |
| Arco Alloys Corp.                     | 42.38 -83.05 Alloy             | Alloy products & casting      | 1891 Trombly St Detroit               | Michi- 48211<br>gan |
| Crown Alloys Company                  | 42.51 -83.12 Alloy             | Alloy products & casting      | 30105 Stephenson Hwy Madison Heights  | Michi- 48071<br>gan |
| Metro Corporation                     | 42.42 -83.06 Alloy             | Alloy products & casting      | 17385 Ryan Rd Hamtramck               | Michi- 48212<br>gan |
| SAS Global Corporation                | 42.46 -83.01 Alloy             | Alloy products & casting      | 21601 Mullin Ave Warren               | Michi- 48089<br>gan |
| Eutectic Engineering Co               | 42.42 -83.04 Aluminum Castings | Alloy products & casting      | 6350 E Davison St Hamtramck           | Michi- 48212<br>gan |
| Metro Alloys                          | 42.42 -83.06 Aluminum Castings | Alloy products & casting      | 17385 Ryan Rd                         | Michi- 48212<br>gan |
| Super Steel Treating Co               | 42.47 -83.04 Annealing         | Annealing, plating & coatings | 6227 Rinke Ave Warren                 | Michi- 48091<br>gan |
| Weldaloy Specialty Forgings           | 42.47 -83.01 Annealing         | Annealing, plating & coatings | 24011 Hoover Rd Warren                | Michi- 48089<br>gan |
| Western Engineered Products           | 42.82 -83.25 Annealing         | Annealing, plating & coatings | 465 S Glaspie St suite g Oxford       | Michi- 48371<br>gan |
| 2 New Detailing- Paint Correction & C | 42.47 -82.95 Coatings          | Annealing, plating & coatings | 23450 Gratiot Ave Eastpointe          | Michi- 48021<br>gan |
| AJAX Metal Processing, Inc            | 42.37 -83.02 Coatings          | Annealing, plating & coatings | 4651 Bellevue St Detroit              | Michi- 48207<br>gan |
| A-Line Products Corporation           | 42.36 -83.02 Coatings          | Annealing, plating & coatings | 2955 Bellevue St Detroit              | Michi- 48207<br>gan |
| All Cote Coatings Company             | 42.47 -83.04 Coatings          | Annealing, plating & coatings | 23896 Sherwood Ave Center Line        | Michi- 48015<br>gan |
| Alpine Jig Grinding Company           | 42.34 -83.29 Coatings          | Annealing, plating & coatings | 25325 W Warren StDearborn Heights     | Michi- 48127<br>gan |
| Astral Products                       | 42.57 -83.45 Coatings          | Annealing, plating & coatings | 3182 Martin Pkwy Commerce Charter Twp | Michi- 48390<br>gan |
| Commercial Painting Services          | 42.47 -83.24 Coatings          | Annealing, plating & coatings | 24700 Northwestern Hwy #50 Southfield | Michi- 48075<br>gan |
| Creative Coatings Inc                 | 42.47 -83.04 Coatings          | Annealing, plating & coatings | 24650 Mound Rd Warren                 | Michi- 48091<br>gan |
| Custom Concepts Powder Coating &      | 42.44 -83.04 Coatings          | Annealing, plating & coatings | 19330 Mt Elliott St Detroit           | Michi- 48234<br>gan |
| Derick Jig Grinding Inc               | 42.34 -83.29 Coatings          | Annealing, plating & coatings | 25325 W Warren StDearborn Heights     | Michi- 48127<br>gan |

|                                       |       |        |                    |                               |                         |                     |               |       |
|---------------------------------------|-------|--------|--------------------|-------------------------------|-------------------------|---------------------|---------------|-------|
| Fabcoat Performance Coatings          | 42.22 | -83.15 | Coatings           | Annealing, plating & coatings | 210 Clark St #3         | Wyandotte           | Michi-<br>gan | 48192 |
| Fitzgerald Finishing LLC              | 42.42 | -83.04 | Coatings           | Annealing, plating & coatings | 17450 Filer St          | Detroit             | Michi-<br>gan | 48212 |
| Fletcher Paint (Fletcher Precision Ma | 42.46 | -83.03 | Coatings           | Annealing, plating & coatings | 6795 E 9 Mile Rd        | Warren              | Michi-<br>gan | 48091 |
| Fred's Bump & Paint Shop              | 42.39 | -83.05 | Coatings           | Annealing, plating & coatings | 2951 Council St         | Hamtramck           | Michi-<br>gan | 48212 |
| G & T Commercial Coating              | 42.37 | -83.29 | Coatings           | Annealing, plating & coatings | 25650 Plymouth Rd       | Redford Charter Twp | Michi-<br>gan | 48239 |
| General Acid Proofing Inc             | 42.35 | -83.01 | Coatings           | Annealing, plating & coatings | 1051 Bellevue St        | Detroit             | Michi-<br>gan | 48207 |
| International Hardcoat Inc.           | 42.38 | -83.25 | Coatings           | Annealing, plating & coatings | 12400 Burt Rd           | Detroit             | Michi-<br>gan | 48228 |
| Maaco Auto Body Shop & Painting       | 42.37 | -83.22 | Coatings           | Annealing, plating & coatings | 18250 Plymouth Rd       | Detroit             | Michi-<br>gan | 48228 |
| Magni Industries, Inc.                | 42.32 | -83.11 | Coatings           | Annealing, plating & coatings | 2771 Hammond St         | Detroit             | Michi-<br>gan | 48209 |
| Metro Powder Coating                  | 42.37 | -83.22 | Coatings           | Annealing, plating & coatings | 18434 Fitzpatrick St    | Detroit             | Michi-<br>gan | 48228 |
| MOSTEK PAINT AND GLASS CO             | 42.40 | -83.06 | Coatings           | Annealing, plating & coatings | 11515 Joseph Campau Ave | Hamtramck           | Michi-<br>gan | 48212 |
| Painters Supply & Equipment Co.       | 42.46 | -83.03 | Coatings           | Annealing, plating & coatings | 22134 Van Dyke Ave      | Warren              | Michi-<br>gan | 48089 |
| PPG Paint Store & Paint Sprayer Re    | 42.46 | -83.28 | Coatings           | Annealing, plating & coatings | 23361 Telegraph Rd      | Southfield          | Michi-<br>gan | 48034 |
| Supreme Welding-Powder Coating        | 42.55 | -82.88 | Coatings           | Annealing, plating & coatings | 34727 Nova Dr           | Clinton Twp         | Michi-<br>gan | 48035 |
| United Paint & Chemical Corporation   | 42.47 | -83.28 | Coatings           | Annealing, plating & coatings | 24671 Telegraph Rd      | Southfield          | Michi-<br>gan | 48033 |
| Westside Powder Coat LLC              | 42.19 | -83.39 | Coatings           | Annealing, plating & coatings | 35777 Genron Ct         | Romulus             | Michi-<br>gan | 48174 |
| Artistic Iron Works                   | 42.29 | -83.15 | Iron and Iron Work | Ferrous processing & fabricat | 420 S Oakwood           | Detroit             | Michi-<br>gan | 48217 |
| Fort Iron And Metal                   | 42.29 | -83.13 | Iron and Iron Work | Ferrous processing & fabricat | 9607 Dearborn St        | Detroit             | Michi-<br>gan | 48209 |
| Judd Industrial Contracting Inc       | 42.43 | -83.06 | Iron and Iron Work | Ferrous processing & fabricat | 17900 Ryan Rd           | Detroit             | Michi-<br>gan | 48212 |
| McHugh Iron And Steel Corp            | 42.33 | -83.08 | Iron and Iron Work | Ferrous processing & fabricat | 2400 20th St            | Detroit             | Michi-<br>gan | 48216 |

|                                        |       |        |                    |                               |                        |               |               |       |
|----------------------------------------|-------|--------|--------------------|-------------------------------|------------------------|---------------|---------------|-------|
| Nelson Iron Works Inc                  | 42.39 | -83.04 | Iron and Iron Work | Ferrous processing & fabricat | 6350 Benham St         | Detroit       | Michi-<br>gan | 48211 |
| Acme Wire & Iron Works                 | 42.37 | -83.03 | Iron and Iron Work | Ferrous processing & fabricat | 3527 E Canfield St     | Detroit       | Michi-<br>gan | 48207 |
| Artistic Disenos, Inc                  | 42.31 | -83.12 | Iron and Iron Work | Ferrous processing & fabricat | 6789 Goldsmith St      | Detroit       | Michi-<br>gan | 48209 |
| Bar Processing Warren                  | 42.46 | -82.99 | Iron and Iron Work | Ferrous processing & fabricat | 22534 Groesbeck Hwy    | Warren        | Michi-<br>gan | 48089 |
| Detroit Nipple Works                   | 42.37 | -83.07 | Iron and Iron Work | Ferrous processing & fabricat | 6530 Beaubien Blvd     | Detroit       | Michi-<br>gan | 48202 |
| EJ - Detroit Branch                    | 42.45 | -83.17 | Iron and Iron Work | Ferrous processing & fabricat | 13001 Northend Ave     | Oak Park      | Michi-<br>gan | 48237 |
| Ferrous Processing & Trading           | 42.41 | -83.04 | Iron and Iron Work | Ferrous processing & fabricat | 13200 Mt Elliott St    | Hamtramck     | Michi-<br>gan | 48212 |
| Ferrous Processing & Trading<br>Co Ink | 42.29 | -83.33 | Iron and Iron Work | Ferrous processing & fabricat | 29131 Michigan Ave     | Inkster       | Michi-<br>gan | 48141 |
| Ferrous Processing & Trading<br>Co Wy  | 42.31 | -83.16 | Iron and Iron Work | Ferrous processing & fabricat | 3651 Wyoming Ave       | Dearborn      | Michi-<br>gan | 48120 |
| Ferrous Processing & Trading<br>Co.    | 42.34 | -83.04 | Scrap              | Ferrous processing & fabricat | 1333 Brewery Park Blvd | Detroit       | Michi-<br>gan | 48207 |
| Jefferson Iron Works Inc               | 42.47 | -83.13 | Iron and Iron Work | Ferrous processing & fabricat | 2441 Wolcott St        | Ferndale      | Michi-<br>gan | 48220 |
| Jim's Iron & Aluminum                  | 42.35 | -83.20 | Iron and Iron Work | Ferrous processing & fabricat | 7535 Greenfield Rd     | Detroit       | Michi-<br>gan | 48228 |
| Metal City Fab                         | 42.45 | -82.99 | Iron and Iron Work | Ferrous processing & fabricat | 21200 Schoenherr Rd    | Warren        | Michi-<br>gan | 48089 |
| Nelson Iron Works Inc                  | 42.39 | -83.04 | Iron and Iron Work | Ferrous processing & fabricat | 6350 Benham St         | Detroit       | Michi-<br>gan | 48211 |
| Aluminum Supply Co Inc                 | 42.39 | -83.17 | Metal Fabricators  | Metal fabricator              | 14359 Meyers Rd        | Detroit       | Michi-<br>gan | 48227 |
| Aluminum & Architectural<br>Metals     | 42.36 | -83.13 | Metal Fabricators  | Metal fabricator              | 8711 Epworth St        | Detroit       | Michi-<br>gan | 48204 |
| Anderzaks Machine & Fab LLC            | 42.38 | -83.28 | Metal Fabricators  | Metal fabricator              | 24607 Capitol          | Redford       | Michi-<br>gan | 48239 |
| Boyer Steel                            | 42.44 | -83.11 | Metal Fabricators  | Metal fabricator              | 19640 Charleston St    | Highland Park | Michi-<br>gan | 48203 |
| Detroit Fab                            | 42.43 | -83.04 | Metal Fabricators  | Metal fabricator              | 18480 Mt Elliott St    | Detroit       | Michi-<br>gan | 48234 |
| Fabrications Unlimited Inc             | 42.37 | -83.02 | Metal Fabricators  | Metal fabricator              | 4651 Beaufait St       | Detroit       | Michi-<br>gan | 48207 |



|                                            |       |        |                     |                  |                            |                 |          |       |
|--------------------------------------------|-------|--------|---------------------|------------------|----------------------------|-----------------|----------|-------|
| Franklin Fastener                          | 42.37 | -83.30 | Metal Fabricators   | Metal fabricator | 12071 Beech Daly           | Redford Charter | Michi-   | 48239 |
|                                            |       |        |                     | Twp              |                            |                 | gan      |       |
| GANAS MFG                                  | 42.36 | -83.02 | Metal Fabricators   | Metal fabricator | 3250 Bellevue St           | Detroit         | Michi-   | 48207 |
|                                            |       |        |                     |                  |                            |                 | gan      |       |
| H M White Inc                              | 42.38 | -83.25 | Metal Fabricators   | Metal fabricator | 12855 Burt Rd              | Detroit         | Michi-   | 48223 |
|                                            |       |        |                     |                  |                            |                 | gan      |       |
| J & S Architectural Sheet Metal Inc        | 42.44 | -83.08 | Metal Fabricators   | Metal fabricator | 20137 Dequindre St         | Detroit         | Michi-   | 48234 |
|                                            |       |        |                     |                  |                            |                 | gan      |       |
| J Max Robertson Co                         | 42.40 | -83.17 | Metal Fabricators   | Metal fabricator | 12811 Hillview Street      | Detroit         | Michi-   | 48227 |
|                                            |       |        |                     |                  |                            |                 | gan      |       |
| Lawford Fabricating Co                     | 42.45 | -83.16 | Metal Fabricators   | Metal fabricator | 21650 Wyoming Ct           | Oak Park        | Michi-   | 48237 |
|                                            |       |        |                     |                  |                            |                 | gan      |       |
| Metal Fab Inc.                             | 42.34 | -83.19 | Metal Fabricators   | Metal fabricator | 6900 Chase Rd              | Dearborn        | Michi-   | 48126 |
|                                            |       |        |                     |                  |                            |                 | gan      |       |
| Milton Manufacturing Inc                   | 42.43 | -83.10 | Metal Fabricators   | Metal fabricator | 301 E Grixdale             | Detroit         | Michi-   | 48203 |
|                                            |       |        |                     |                  |                            |                 | gan      |       |
| PK Fabricating                             | 42.46 | -83.12 | Metal Fabricators   | Metal fabricator | 1975 Hilton Rd             | Ferndale        | Michi-   | 48220 |
|                                            |       |        |                     |                  |                            |                 | gan      |       |
| RAMCO - Reliable Architec-<br>tural Meta   | 42.40 | -83.02 | Metal Fabricators   | Metal fabricator | 9751 Erwin Ave             | Detroit         | Michi-   | 48213 |
| Smith Shop                                 | 42.41 | -83.09 | Metal Fabricators   | Metal fabricator | 180 Victor St              | Highland Park   | Michi-   | 48203 |
|                                            |       |        |                     |                  |                            |                 | gan      |       |
| Songer Steel Services                      | 42.29 | -83.11 | Metal Fabricators   | Metal fabricator | 1400 Zug Island Rd         | Detroit         | Michigan | 48209 |
| Arted Chrome Plating Inc                   | 42.37 | -83.07 | Metal Finishers     | Annealing, plat- | coatings 38 Piquette St    | Detroit         | Michigan | 48202 |
|                                            |       |        |                     | ing &            |                            |                 |          |       |
| Automotive Tumbling Com-<br>pany           | 42.36 | -83.02 | Metal Finishers     | Annealing, plat- | coatings 3125 Meldrum St   | Detroit         | Michigan | 48207 |
|                                            |       |        |                     | ing &            |                            |                 |          |       |
| Dci Aerotech Division Of De-<br>troit Chro | 42.40 | -83.15 | Metal Finishers     | Annealing, plat- | coatings 7515 Lyndon St    | Detroit         | Michigan | 48238 |
|                                            |       |        |                     | ing &            |                            |                 |          |       |
| Fitzgerald Finishing Co                    | 42.42 | -83.04 | Metal Finishers     | Annealing, plat- | coatings 17450 Filer St    | Hamtramck       | Michigan | 48212 |
|                                            |       |        |                     | ing &            |                            |                 |          |       |
| Liberty Burnishing Co                      | 42.43 | -83.03 | Metal Finishers     | Annealing, plat- | coatings 18401 Sherwood St | Detroit         | Michigan | 48234 |
|                                            |       |        |                     | ing &            |                            |                 |          |       |
| Bellevue Processing Corp                   | 42.37 | -83.02 | Metal Heat Treating | Heat treating    | 5143 Bellevue St           | Detroit         | Michigan | 48211 |
| Can Am                                     | 42.42 | -83.07 | Metal Heat Treating | Heat treating    | 2731 Jerome St             | Detroit         | Michigan | 48212 |
| Cooper Heat Treating LLC                   | 42.45 | -83.03 | Metal Heat Treating | Heat treating    | 20251 Sherwood St          | Detroit         | Michigan | 48234 |
| Detroit Flame Hardening Co                 | 42.42 | -83.04 | Metal Heat Treating | Heat treating    | 17644 Mount Elliott St     | Hamtramck       | Michigan | 48212 |
| Federal Screw Works                        | 42.33 | -83.05 | Metal Heat Treating | Heat treating    | 535 Griswold St            | Detroit         | Michigan | 48226 |
| Fire Rite Inc                              | 42.39 | -83.18 | Metal Heat Treating | Heat treating    | 13801 Lyndon St            | Detroit         | Michigan | 48227 |
| Hy Vac Technologies Incorpo-<br>rated      | 42.38 | -83.20 | Metal Heat Treating | Heat treating    | 15701 Glendale St          | Detroit         | Michigan | 48227 |
| Kamax Gb Dupont Lp                         | 42.39 | -83.05 | Metal Heat Treating | Heat treating    | 3120 Denton St             | Hamtramck       | Michigan | 48211 |
| Hamtramck                                  |       |        |                     |                  |                            |                 |          |       |

|                                       |       |        |                           |                  |                            |                     |          |       |
|---------------------------------------|-------|--------|---------------------------|------------------|----------------------------|---------------------|----------|-------|
| Superior Heat Treat Inc               | 42.40 | -83.01 | Metal Heat Treating       | Heat treating    | 9770 Grinnell St           | Detroit             | Michigan | 48213 |
| Aalberts surface technologies - HIP I | 42.37 | -83.41 | Metal Heat Treating       | Heat treating    | 12238 Newburgh Rd          | Livonia             | Michigan | 48150 |
| Almar Industries Inc                  | 42.45 | -83.08 | Metal Heat Treating       | Heat treating    | 21005 Dequindre Rd #2610   | Hazel Park          | Michigan | 48030 |
| American Metal Processing Co          | 42.46 | -83.00 | Metal Heat Treating       | Heat treating    | 22720 Nagel St             | Warren              | Michigan | 48089 |
| Apollo Heat Treating                  | 42.46 | -83.17 | Metal Heat Treating       | Heat treating    | 10400 Capital St           | Oak Park            | Michigan | 48237 |
| Bodycote Thermal Processing           | 42.38 | -83.36 | Metal Heat Treating       | Heat treating    | 31888 Glendale St          | Livonia             | Michigan | 48150 |
| Cooper Heat Treating LLC              | 42.45 | -83.04 | Metal Heat Treating       | Heat treating    | 20251 Sherwood St          | Detroit             | Michigan | 48234 |
| Detroit Steel Treating Co             | 42.68 | -83.29 | Metal Heat Treating       | Heat treating    | 1631 E Highwood            | Pontiac             | Michigan | 48340 |
| East-Lind Heat Treat Inc              | 42.53 | -83.09 | Metal Heat Treating       | Heat treating    | 32045 Dequindre Rd         | Madison Heights     | Michigan | 48071 |
| Engineered Heat Treat, Inc.           | 42.52 | -83.12 | Metal Heat Treating       | Heat treating    | 31271 Stephenson Hwy       | Madison Heights     | Michigan | 48071 |
| Fire-Rite Inc                         | 42.39 | -83.18 | Metal Heat Treating       | Heat treating    | 13801 Lyndon St            | Detroit             | Michigan | 48227 |
| Heat Treating Services                | 42.62 | -83.28 | Metal Heat Treating       | Heat treating    | 217 Central Ave            | Pontiac             | Michigan | 48341 |
| Hy-Vac Technologies Inc               | 42.38 | -83.20 | Metal Heat Treating       | Heat treating    | 15701 Glendale St          | Detroit             | Michigan | 48227 |
| Induction Services Inc                | 42.48 | -83.04 | Metal Heat Treating       | Heat treating    | 24800 Mound Rd             | Warren              | Michigan | 48091 |
| Induction. Processing                 | 42.48 | -83.00 | Metal Heat Treating       | Heat treating    | 24872 Gibson Dr            | Warren              | Michigan | 48089 |
| Nitro-Vac Heat Treat Inc.             | 42.46 | -83.08 | Metal Heat Treating       | Heat treating    | 23080 Dequindre Rd         | Warren              | Michigan | 48091 |
| Nor-Cote Inc                          | 42.47 | -83.01 | Metal Heat Treating       | Heat treating    | 11425 Timken Ave           | Warren              | Michigan | 48089 |
| Precision Steel Treating Co           | 42.42 | -83.04 | Metal Heat Treating       | Heat treating    | 17635 Mt Elliott St        | Detroit             | Michigan | 48212 |
| Specialty Steel Treating Inc          | 42.55 | -82.94 | Metal Heat Treating       | Heat treating    | 34501 Commerce Rd          | Fraser              | Michigan | 48026 |
| Superior Heat Treat LLC               | 42.56 | -82.92 | Metal Heat Treating       | Heat treating    | 36125 Groesbeck Hwy        | Clinton Twp         | Michigan | 48035 |
| Peerless Metal Powders Incorporated   | 42.32 | -83.11 | Metal Powder Fabricating  | Metal fabricator | 124 S Military St          | Detroit             | Michigan | 48209 |
| Aluminum Supply Co Inc                | 42.39 | -83.17 | Metal Products            | Metal fabricator | 14359 Meyers Rd            | Detroit             | Michigan | 48227 |
| Detroit Tube Products                 | 42.31 | -83.09 | Metal Products            | Metal fabricator | 300 S Junction St          | Detroit             | Michigan | 48209 |
| H & H Metals Co                       | 42.29 | -83.33 | Metal Products            | Metal fabricator | 29131 Michigan Ave         | Inkster             | Michigan | 48141 |
| Shr Development Inc                   | 42.38 | -83.24 | Metal Products            | Metal fabricator | 20539 Glendale St          | Detroit             | Michigan | 48223 |
| Sikora Metals                         | 42.41 | -83.04 | Metal Products            | Metal fabricator | 12850 Mount Elliott Street | Detroit             | Michigan | 48212 |
| Steel Services                        | 42.32 | -83.12 | Metal Products            | Metal fabricator | 3401 Martin St             | Detroit             | Michigan | 48210 |
| Vulcanmasters Welding                 | 42.29 | -83.15 | Metal Products            | Metal fabricator | 374 S Fordson St           | Detroit             | Michigan | 48217 |
| Winston Brothers Iron & Metal Comp    | 42.42 | -83.07 | Metal Products            | Metal fabricator | 17384 Conant St            | Detroit             | Michigan | 48212 |
| Alro Steel, Detroit                   | 42.43 | -83.04 | Metal Products            | Metal fabricator | 18695 Sherwood St          | Detroit             | Michigan | 48234 |
| Detroit Architectural Metal           | 42.38 | -83.29 | Metal Products            | Metal fabricator | 25501 Glendale             | Redford Charter Twp | Michigan | 48239 |
| Inter-City Steel Company              | 42.42 | -83.07 | Metal Products            | Metal fabricator | 17901 Conant               | Detroit             | Michigan | 48212 |
| Metal Design & Manufacturing          | 42.43 | -83.06 | Metal Products            | Metal fabricator | 17891 Ryan Rd              | Detroit             | Michigan | 48212 |
| Quality Bending & Threading           | 42.35 | -83.09 | Metal Products            | Metal fabricator | 5100 Stanton St            | Detroit             | Michigan | 48208 |
| Meccom Corporation                    | 42.34 | -83.14 | Metal Rolling and Forming | Metal fabricator | 5945 Martin St             | Detroit             | Michigan | 48210 |

|                                        |       |        |                                |                  |                     |               |          |       |
|----------------------------------------|-------|--------|--------------------------------|------------------|---------------------|---------------|----------|-------|
| Meccom Inc                             | 42.34 | -83.14 | Metal Rolling and Form-<br>ing | Metal fabricator | 5945 Martin St      | Detroit       | Michigan | 48210 |
| American Modern Roofing                | 42.40 | -83.18 | Metal Roofing and Siding       | Metal fabricator | 14916 Schaefer Hwy  | Detroit       | Michigan | 48227 |
| Cass Sheet Metal                       | 42.39 | -82.98 | Metal Roofing and Siding       | Metal fabricator | 5641 Conner St      | Detroit       | Michigan | 48213 |
| Coil Slitting                          | 42.42 | -83.06 | Metal Slit and Shear           | Metal fabricator | 17155 Conant St     | Hamtramck     | Michigan | 48212 |
| Metro Shearing                         | 42.36 | -83.02 | Metal Slit and Shear           | Metal fabricator | 3250 Bellevue St    | Detroit       | Michigan | 48207 |
| Advance Engineering Co                 | 42.37 | -83.28 | Metal Stamping                 | Metal stamping   | 12025 Dixie         | Redford       | Michigan | 48239 |
| L & W Engineering                      | 42.40 | -83.08 | Metal Stamping                 | Metal stamping   | 1200 Woodland St    | Detroit       | Michigan | 48211 |
| Martinrea Fabco Hot Stamp-<br>ings     | 42.38 | -83.23 | Metal Stamping                 | Metal stamping   | 19200 Glendale St   | Detroit       | Michigan | 48223 |
| Metro Stamping & Manufac-<br>turing Co | 42.38 | -83.31 | Metal Stamping                 | Metal stamping   | 26955 Fullerton     | Redford       | Michigan | 48239 |
| Motor City Industries Inc              | 42.29 | -83.12 | Metal Stamping                 | Metal stamping   | 8955 Thaddeus St    | Detroit       | Michigan | 48209 |
| New Center Stamping Inc                | 42.37 | -83.06 | Metal Stamping                 | Metal stamping   | 1140 E Milwaukee St | Detroit       | Michigan | 48211 |
| New Center Stamping Inc Fax            | 42.37 | -83.06 | Metal Stamping                 | Metal stamping   | 950 E Milwaukee St  | Detroit       | Michigan | 48211 |
| Wayne Stamping International           | 42.43 | -83.10 | Metal Stamping                 | Metal stamping   | 301 E Grixdale      | Highland Park | Michigan | 48203 |
| Wedu Manufacturing Corp                | 42.37 | -83.28 | Metal Stamping                 | Metal stamping   | 12042 Woodbine      | Hamtramck     | Michigan | 48239 |
| Sherwood Prototype Inc.                | 42.41 | -83.09 | Metal Stamping                 | Metal stamping   | 124 Victor St #3130 | Highland Park | Michigan | 48203 |
| Ferrous Processing & Trading<br>Co Po  | 42.69 | -83.30 | Non-Ferrous                    | Scrap metals     | 500 Collier Rd      | Auburn Hills  | Michigan | 48326 |
| Kwik Paint Products                    | 42.37 | -83.06 | Retail - Coatings              | X                | 6040 Russell St     | Detroit       | Michigan | 48211 |
| PT Automotive Paints & Parts           | 42.33 | -83.11 | Retail - Coatings              | X                | 4828 Michigan Ave   | Detroit       | Michigan | 48210 |
| Hammer Time True Value                 | 42.42 | -83.14 | Retail - HW                    | X                | 17400 Livernois     | Detroit       | Michigan | 48221 |
| Hardware                               |       |        |                                |                  |                     |               |          |       |
| Baker's Gas & Welding Supplies         | 42.26 | -83.18 | Retail - Welding               | X                | 1300 Howard St      | Lincoln Park  | Michigan | 48146 |
| Larry's Welding Supply                 | 42.46 | -82.98 | Retail - Welding               | X                | 13845 E 9 Mile Rd   | Warren        | Michigan | 48089 |
| Linde Welding Gas & Equip-<br>ment Cen | 42.33 | -83.16 | Retail - Welding               | X                | 5825 Wyoming Ave    | Dearborn      | Michigan | 48126 |
| New Century Welding                    | 42.46 | -83.08 | Retail - Welding               | X                | 22621 Dequindre Rd  | Hazel Park    | Michigan | 48030 |
| Nortronic Co                           | 42.45 | -83.03 | Retail - Welding               | X                | 20210 Sherwood St   | Detroit       | Michigan | 48234 |
| Robinson Welding Supply                | 42.37 | -83.36 | Retail - Welding               | X                | 31700 Plymouth Rd   | Livonia       | Michigan | 48150 |
| Roy Smith Company                      | 42.45 | -83.28 | Retail - Welding               | X                | 21348 Telegraph Rd  | Southfield    | Michigan | 48033 |
| Weld-Aid                               | 42.42 | -83.08 | Retail - Welding               | X                | 14650 Dequindre St  | Detroit       | Michigan | 48212 |
| Welders Welding Supply Co              | 42.27 | -83.24 | Retail - Welding               | X                | 20643 Van Born Rd   | Taylor        | Michigan | 48180 |
| Novi Tool & Machine Inc                | 42.38 | -83.28 | Retail Machine                 | X                | 12202 Woodbine      |               | Michigan | 48239 |
| Sherwin-Williams Automotive<br>Finishe | 42.40 | -83.28 | Retail Paints                  | X                | 15324 Telegraph Rd  | Detroit       | Michigan | 48239 |
| Sherwin-Williams Commercial<br>Paint   | 42.39 | -83.18 | Retail Paints                  | X                | 13415 Lyndon St     | Detroit       | Michigan | 48227 |
| Sherwin-Williams Paint Store           | 42.41 | -82.93 | Retail Paints                  | X                | 17100 E Warren Ave  | Detroit       | Michigan | 48224 |
| Sherwin-Williams Product               | 42.45 | -83.18 | Retail Paints                  | X                | 13101 Northend Ave  | Oak Park      | Michigan | 48237 |

## Finishes F

|                                  |       |        |               |              |                        |                  |          |       |
|----------------------------------|-------|--------|---------------|--------------|------------------------|------------------|----------|-------|
| Smiley Paint Supply              | 42.33 | -83.29 | Retail Paints | X            | 25248 Ford Rd          | Dearborn Heights | Michigan | 48127 |
| 1-800-Cars4Cash                  | 42.40 | -83.18 | Scrap         | Scrap metals | 13840 Fenkell Ave.     | Detroit          | Michigan | 48227 |
| A & Z Scrap                      | 42.34 | -83.23 | Scrap         | Scrap metals | 19550 West Warren      | Detroit          | Michigan | 48228 |
| A Gold & Sons                    |       |        | Scrap         | Scrap metals |                        | Detroit          | Michigan | 48201 |
| Abdul's Trucking                 | 42.42 | -83.10 | Scrap         | Scrap metals | 129 Candler St         | Highland Park    | Michigan | 48234 |
| Cash for junk cars in Detroit mi | 42.44 | -83.06 | Scrap         | Scrap metals | 19714 Ryan Rd          | Detroit          | Michigan | 48234 |
| Commodity Resources              | 42.37 | -83.03 | Scrap         | Scrap metals | 3433 E Warren Ave      | Detroit          | Michigan | 48207 |
| Continental Metal Co Inc         | 42.40 | -83.07 | Scrap         | Scrap metals | 11500 Russell St       | Detroit          | Michigan | 48211 |
| Detroit Iron & Metal Co          | 42.32 | -83.13 | Scrap         | Scrap metals | 8300 Dix Ave           | Detroit          | Michigan | 48209 |
| Detroit Iron & Metal Company     | 42.35 | -83.07 | Scrap         | Scrap metals | Detroit                |                  | Michigan | 48201 |
| Downriver Torching Service       | 42.28 | -83.14 | Scrap         | Scrap metals | 750 S Deacon St        | Detroit          | Michigan | 48217 |
| Fast Cash for your Junk Car      | 42.37 | -83.18 | Scrap         | Scrap metals | 9960 Freeland          | Detroit          | Michigan | 48227 |
| Freedman David Inc               | 42.29 | -83.16 | Scrap         | Scrap metals | 893 S Dix St           | Detroit          | Michigan | 48217 |
| Fritz Enterprises                | 42.37 | -83.15 | Scrap         | Scrap metals | 7777 W Chicago         | Detroit          | Michigan | 48204 |
| Global Titanium Inc              | 42.44 | -83.04 | Scrap         | Scrap metals | 19300 Filer St         | Detroit          | Michigan | 48234 |
| GLR Advanced Recycling - Cars    | 42.40 | -83.18 | Scrap         | Scrap metals | 13840 Fenkell          | Detroit          | Michigan | 48227 |
| H & H Metals                     | 42.29 | -83.33 | Scrap         | Scrap metals | 29001 Michigan Ave     | Inkster          | Michigan | 48141 |
| Iron Mike's Metal Prices USA LLC | 42.38 | -83.20 | Scrap         | Scrap metals | 12844 Greenfield Rd    | Detroit          | Michigan | 48227 |
| Junk Car Top Dollar              | 42.33 | -83.19 | Scrap         | Scrap metals | 6031 Coleman St        | Dearborn         | Michigan | 48126 |
| Junk My Car Detroit              | 42.40 | -83.18 | Scrap         | Scrap metals | 13840 Fenkell Avenue   | Detroit          | Michigan | 48227 |
| Kee Container Services LLC       | 42.41 | -83.04 | Scrap         | Scrap metals | 13200 Mount Elliott St | Hamtramck        | Michigan | 48212 |
| Kimmel Scrap Iron & Metal        | 42.37 | -83.15 | Scrap         | Scrap metals | 10571 Grand River      | Detroit          | Michigan | 48204 |
| MAG Automotive Recycling and Cas | 42.43 | -83.04 | Scrap         | Scrap metals | 18489 Mt Elliot        | Detroit          | Michigan | 48234 |
| McNichols Scrap Iron & Metal Co  |       |        | Scrap         | Scrap metals |                        | Detroit          | Michigan | 48201 |
| Metal Dynamics Detroit           | 42.32 | -83.14 | Scrap         | Scrap metals | 3100 Lonyo St          | Detroit          | Michigan | 48209 |
| Metro Detroit Metals LLC         | 42.40 | -83.07 | Scrap         | Scrap metals | 1401 Woodland St       | Detroit          | Michigan | 48211 |
| Midwest Steel                    | 42.29 | -83.16 | Scrap         | Scrap metals | 13500 Pleasant St      | Detroit          | Michigan | 48217 |
| Parts A Plenty Inc               | 42.40 | -83.16 | Scrap         | Scrap metals | 10441 Lyndon St        | Detroit          | Michigan | 48238 |
| Pita Metals                      | 42.29 | -83.15 | Scrap         | Scrap metals | 411 S Fort St          | Detroit          | Michigan | 48217 |
| Pro Green Recycling              | 42.40 | -83.28 | Scrap         | Scrap metals | 15500 Telegraph Rd     | Redford          | Michigan | 48239 |
| PSC Metals                       | 42.42 | -83.04 | Scrap         | Scrap metals | 6450 E McNichols Rd    | Hamtramck        | Michigan | 48212 |
| Rex Meadows                      | 42.36 | -83.19 | Scrap         | Scrap metals | 9151 Hubbell St        | Detroit          | Michigan | 48228 |
| Rex Metal Recycling Company      | 42.36 | -83.19 | Scrap         | Scrap metals | 9151 Hubbell St        | Detroit          | Michigan | 48228 |
| RLB Car Care                     | 42.36 | -83.15 | Scrap         | Scrap metals | 8951 Alpine St         | Detroit          | Michigan | 48204 |
| Scrap Metal Management           | 42.32 | -83.13 | Scrap         | Scrap metals | 7900 Dix St            | Detroit          | Michigan | 48209 |



|                                     |       |        |       |              |                          |                     |          |       |
|-------------------------------------|-------|--------|-------|--------------|--------------------------|---------------------|----------|-------|
| Scrap Metal Processing              | 42.32 | -83.13 | Scrap | Scrap metals | 7900 Dix St              | Detroit             | Michigan | 48209 |
| Sikora Metals Inc                   | 42.35 | -83.07 | Scrap | Scrap metals |                          | Detroit             | Michigan | 48201 |
| Silver's Metal Co                   |       |        | Scrap | Scrap metals |                          | Detroit             | Michigan | 48201 |
| Smile Recycling                     |       |        | Scrap | Scrap metals |                          | Detroit             | Michigan | 48201 |
| Southwest Metals Inc                | 42.30 | -83.12 | Scrap | Scrap metals | 8122 W Fort St           | Detroit             | Michigan | 48209 |
| State Metal Co                      | 42.30 | -83.09 | Scrap | Scrap metals | 444 S Campbell St        | Detroit             | Michigan | 48209 |
| Tri Star International Trading Co   | 42.38 | -83.20 | Scrap | Scrap metals | 15750 Fullerton St       | Detroit             | Michigan | 48227 |
| Vito's Salvage                      | 42.42 | -83.04 | Scrap | Scrap metals | 6440 E Davison St        | Hamtramck           | Michigan | 48212 |
| We Buy Junk Cars                    | 42.37 | -83.18 | Scrap | Scrap metals | 14301 W Chicago St       | Detroit             | Michigan | 48228 |
| Winston Brothers Iron & Metal Co    | 42.42 | -83.07 | Scrap | Scrap metals | 17384 Conant Street      | Detroit             | Michigan | 48212 |
| Cardinal Recycling                  | 42.42 | -83.04 | Scrap | Scrap metals | 6401 E Davison St        | Hamtramck           | Michigan | 48212 |
| City Recycling Inc                  | 42.35 | -83.04 | Scrap | Scrap metals | 1943 Mack Ave            | Detroit             | Michigan | 48207 |
| Detroit Iron & Metal Co             | 42.32 | -83.13 | Scrap | Scrap metals | 8300 Dix Ave             | Detroit             | Michigan | 48209 |
| Ferrous Processing & Trading Co     | 42.32 | -83.15 | Scrap | Scrap metals | 9100 John Kronk St       | Detroit             | Michigan | 48210 |
| Ferrous Processing & Trading Co Kro | 42.32 | -83.15 | Scrap | Scrap metals | 9100 John Kronk St       | Detroit             | Michigan | 48210 |
| Ferrous Processing & Trading Lonyo  | 42.32 | -83.14 | Scrap | Scrap metals | 3100 Lonyo St            | Detroit             | Michigan | 48209 |
| Fort Iron & Metal                   | 42.29 | -83.13 | Scrap | Scrap metals | 9607 Dearborn St         | Detroit             | Michigan | 48209 |
| GLE Scrap Metal - Detroit           | 42.27 | -83.17 | Scrap | Scrap metals | 25435 W Outer Dr         | Melvindale          | Michigan | 48122 |
| GLE Scrap Metal - Warren            | 42.46 | -83.03 | Scrap | Scrap metals | 22200 Sherwood Ave       | Warren              | Michigan | 48091 |
| GT Michigan Scrap Recycling         | 42.45 | -83.09 | Scrap | Scrap metals | 1411 E 8 Mile Service Rd | Hazel Park          | Michigan | 48030 |
| Kimmel Scrap Iron & Metal Co        | 42.37 | -83.15 | Scrap | Scrap metals | 10571 Grand River Ave    | Detroit             | Michigan | 48204 |
| Lafayette Recycling                 | 42.32 | -83.13 | Scrap | Scrap metals | 7700 Dix St              | Detroit             | Michigan | 48209 |
| McNichols Scrap Iron & Metal        | 42.42 | -83.04 | Scrap | Scrap metals | 6500 E McNichols Rd      | Detroit             | Michigan | 48212 |
| Pita Metals                         | 42.29 | -83.15 | Scrap | Scrap metals | 411 S Fort St            | Detroit             | Michigan | 48217 |
| Red Metals Recycling                | 42.37 | -83.28 | Scrap | Scrap metals | 12065 Telegraph Rd       | Redford Charter Twp | Michigan | 48239 |
| Schlafer Iron & Steel Inc           | 42.37 | -83.05 | Scrap | Scrap metals | 1950 Medbury St          | Detroit             | Michigan | 48211 |
| Scrap Recyclers LLC                 | 42.45 | -83.09 | Scrap | Scrap metals | 1201 8 Mile Rd           | Hazel Park          | Michigan | 48030 |
| Sikora Metals                       | 42.41 | -83.04 | Scrap | Scrap metals | 12850 Mt Elliott St      | Detroit             | Michigan | 48212 |
| SLC Recycling Industries Inc        | 42.45 | -83.02 | Scrap | Scrap metals | 8701 8 Mile Rd           | Warren              | Michigan | 48089 |
| Southend Metals Recycling           | 42.32 | -83.16 | Scrap | Scrap metals | 3740 Wyoming Ave         | Dearborn            | Michigan | 48120 |
| Strong Steel Products               | 42.38 | -83.03 | Scrap | Scrap metals | 6464 Strong St           | Detroit             | Michigan | 48211 |
| Winston Brothers Iron & Metal Comp  | 42.42 | -83.06 | Scrap | Scrap metals | 17384 Conant             | Detroit             | Michigan | 48212 |

|                                      |       |        |                               |                  |                         |            |          |       |
|--------------------------------------|-------|--------|-------------------------------|------------------|-------------------------|------------|----------|-------|
| A & B Steel Shearing Inc             | 42.44 | -83.04 | Steel Products and Processing | Metal fabricator | 3840 Outer Dr E         | Detroit    | Michigan | 48234 |
| Aaple fabricating and Conveyors      | 42.44 | -83.04 | Steel Products and Processing | Metal fabricator | 19354 Mt Elliott St     | Detroit    | Michigan | 48234 |
| Alro Steel Processing, Detroit Kurtz | 42.43 | -83.03 | Steel Products and Processing | Metal fabricator | 18881 Sherwood St       | Detroit    | Michigan | 48234 |
| Chappell Steel Co Inc                | 42.33 | -83.10 | Steel Products and Processing | Metal fabricator | 3545 Scotten St         | Detroit    | Michigan | 48210 |
| Concentric Steel                     | 42.43 | -83.06 | Steel Products and Processing | Metal fabricator | 4150 Nevada Ave         | Detroit    | Michigan | 48234 |
| Detroit Steel Processing             | 42.38 | -83.19 | Steel Products and Processing | Metal fabricator | 12301 Hubbell Ave       | Detroit    | Michigan | 48227 |
| Finkl Steel - Composite              | 42.32 | -83.07 | Steel Products and Processing | Metal fabricator | 2323 W Fort St          | Detroit    | Michigan | 48216 |
| Gal-Cro Steel Processing             | 42.33 | -83.13 | Steel Products and Processing | Metal fabricator | 3631 Parkinson St       | Detroit    | Michigan | 48210 |
| Hascall Steel Company                | 42.39 | -83.04 | Steel Products and Processing | Metal fabricator | 6349 Strong St          | Detroit    | Michigan | 48211 |
| Koil Metals                          | 42.35 | -83.01 | Steel Products and Processing | Metal fabricator | 3400 E Lafayette St     | Detroit    | Michigan | 48207 |
| Liberty Steel                        | 42.40 | -82.99 | Steel Products and Processing | Metal fabricator | 11100- 11148 Harper Ave | Detroit    | Michigan | 48213 |
| Midwest Steel Inc                    | 42.38 | -83.05 | Steel Products and Processing | Metal fabricator | 2525 E Grand Blvd       | Detroit    | Michigan | 48211 |
| Mill Steel Company - Melvindale      | 42.28 | -83.17 | Steel Products and Processing | Metal fabricator | 18030 Rialto St         | Melvindale | Michigan | 48122 |
| Olympic Steel                        | 42.33 | -83.12 | Steel Products and Processing | Metal fabricator | 3600 Military St        | Detroit    | Michigan | 48210 |
| Pacific Steel                        | 42.42 | -83.02 | Steel Products and Processing | Metal fabricator | 17157 Van Dyke Ave      | Detroit    | Michigan | 48234 |
| Security Steel Processing Co         | 42.38 | -83.19 | Steel Products and Processing | Metal fabricator | 12211 Coyle Ave         | Detroit    | Michigan | 48227 |
| Service Steel                        | 42.42 | -83.03 | Steel Products and Processing | Metal fabricator | 13700 Sherwood St       | Detroit    | Michigan | 48212 |
| SMI STEEL LLC                        | 42.42 | -83.03 | Steel Products and Processing | Metal fabricator | 6773 E Davison St       | Detroit    | Michigan | 48212 |
| The Federal Group USA                | 42.45 | -83.17 | Steel Products and Processing | Metal fabricator | 10711 Northend Ave      | Ferndale   | Michigan | 48220 |
| Tri-Star Steel Processing Center - A | 42.36 | -83.18 | Steel Products and Processing | Metal fabricator | 14334 Ellis St          | Detroit    | Michigan | 48228 |
| Unique Metal Products                | 42.46 | -83.12 | Steel Products and            | Metal fabricator | 1300 Hilton Rd          | Ferndale   | Michigan | 48220 |

| Processing                       |       |        |                               |                  |                      |                     |          |       |  |
|----------------------------------|-------|--------|-------------------------------|------------------|----------------------|---------------------|----------|-------|--|
| V & S Detroit Galvanizing LLC    | 42.38 | -83.29 | Steel Products and Processing | Metal fabricator | 12600 Arnold St      | Redford Charter Twp | Michigan | 48239 |  |
| Addison Iron Fabricators         | 42.35 | -83.02 | Welding                       | Welding          | 3449 E Vernor Hwy    | Detroit             | Michigan | 48207 |  |
| Airgas Fill Plant                | 42.46 | -83.12 | Welding                       | Welding          | 1200 Farrow St       | Ferndale            | Michigan | 48220 |  |
| American Welding & Press Rpr     | 42.44 | -83.31 | Welding                       | Welding          | 26500 Eight Mile Rd  | Southfield          | Michigan | 48033 |  |
| Ayoub Custom Welding             | 42.34 | -83.14 | Welding                       | Welding          | 7525 W Warren Ave    | Detroit             | Michigan | 48210 |  |
| Carter's Welding                 | 42.29 | -83.17 | Welding                       | Welding          | 14300 Mellon St      | Detroit             | Michigan | 48217 |  |
| CBP Fabrication                  | 42.38 | -83.20 | Welding                       | Welding          | 12700 Mansfield St   | Detroit             | Michigan | 48227 |  |
| Classic Welding Inc.             | 42.45 | -83.06 | Welding                       | Welding          | 21500 Ryan Rd        | Warren              | Michigan | 48091 |  |
| Conner's Welding Inc             | 42.41 | -83.02 | Welding                       | Welding          | 8081 Lynch Rd        | Detroit             | Michigan | 48234 |  |
| DC Mobile Welding                |       |        | Welding                       | Welding          |                      | Detroit             | Michigan | 48272 |  |
| Downriver Welding                | 42.28 | -83.17 | Welding                       | Welding          | 17580 Dix Rd         | Melvindale          | Michigan | 48122 |  |
| Dunn's Welding Inc               | 42.46 | -83.26 | Welding                       | Welding          | 22930 Lahser Rd      | Southfield          | Michigan | 48033 |  |
| Electro Arc Welding              | 42.43 | -83.05 | Welding                       | Welding          | 5717 E 7 Mile Rd     | Detroit             | Michigan | 48234 |  |
| Fairlane Welding                 | 42.35 | -83.19 | Welding                       | Welding          | 14711 Tireman Ave    | Dearborn            | Michigan | 48126 |  |
| Fav's Welding Services           | 42.28 | -83.16 | Welding                       | Welding          | 17126 Francis St     | Melvindale          | Michigan | 48122 |  |
| Ferrous Wolf Fabrication         | 42.37 | -83.02 | Welding                       | Welding          | 4801 Bellevue St     | Detroit             | Michigan | 48207 |  |
| Gutes Welding                    | 42.29 | -83.15 | Welding                       | Welding          | 779 S Dumfries St    | Detroit             | Michigan | 48217 |  |
| Imperial Welding Inc             | 42.43 | -83.30 | Welding                       | Welding          | 25838 W 7 Mile Rd    | Redford             | Michigan | 48240 |  |
| Jams Metal Fab                   | 42.40 | -83.02 | Welding                       | Welding          | 8700 Grinnell St     | Detroit             | Michigan | 48213 |  |
| Jeford Industries                | 42.31 | -83.08 | Welding                       | Welding          | 4120 W Jefferson Ave | Detroit             | Michigan | 48209 |  |
| John E Green Co                  | 42.41 | -83.09 | Welding                       | Welding          | 200 Victor St        | Highland Park       | Michigan | 48203 |  |
| Just In Time Welding LLC         | 42.36 | -82.98 | Welding                       | Welding          | 385 Parkview Dr      | Detroit             | Michigan | 48214 |  |
| King's Welding Works Inc         | 42.46 | -83.17 | Welding                       | Welding          | 10311 Capital St     | Oak Park            | Michigan | 48237 |  |
| L & B Welding                    | 42.31 | -83.15 | Welding                       | Welding          | 3601 Wyoming St      | Dearborn            | Michigan | 48120 |  |
| Luckys Welding                   | 42.29 | -83.16 | Welding                       | Welding          | 895 S Dix St         | Detroit             | Michigan | 48217 |  |
| Lynch Welding Company            | 42.41 | -83.02 | Welding                       | Welding          | 8081 Lynch Rd        | Detroit             | Michigan | 48234 |  |
| Marathon Metals LLC              | 42.36 | -83.02 | Welding                       | Welding          | 6440 Mack Ave        | Detroit             | Michigan | 48207 |  |
| Master Welding                   | 42.40 | -83.02 | Welding                       | Welding          | 9425 Van Dyke St     | Detroit             | Michigan | 48213 |  |
| Mc Hugh Iron & Steel Corporation | 42.33 | -83.08 | Welding                       | Welding          | 2400 20th St         | Detroit             | Michigan | 48216 |  |
| Metro Corp                       | 42.42 | -83.06 | Welding                       | Welding          | 17385 Ryan Rd        | Hamtramck           | Michigan | 48212 |  |
| Michigan Welding Services        | 42.27 | -83.30 | Welding                       | Welding          | 26508 Powers Ave     | Dearborn Heights    | Michigan | 48125 |  |
| Mobile master welding            | 42.40 | -83.02 | Welding                       | Welding          | 9425 Van Dyke Ave    | Detroit             | Michigan | 48213 |  |
| Monroe Mobile Welding            | 42.26 | -83.15 | Welding                       | Welding          | 2977 S Bassett St    | Detroit             | Michigan | 48217 |  |
| National Tool & Die Welding Co   | 42.38 | -83.35 | Welding                       | Welding          | 13340 Merriman Rd    | Livonia             | Michigan | 48150 |  |
| Northern Tier Services Inc       | 42.41 | -83.02 | Welding                       | Welding          | 8081 Lynch Rd        | Detroit             | Michigan | 48234 |  |
| Plumbing & Heating Industry      | 42.44 | -83.19 | Welding                       | Welding          | 14801 W 8 Mile Rd    | Detroit             | Michigan | 48235 |  |

|                                          |       |        |         |         |                            |                        |          |       |
|------------------------------------------|-------|--------|---------|---------|----------------------------|------------------------|----------|-------|
| Premier Rack & Fabricating               | 42.38 | -83.28 | Welding | Welding | 24518 Capitol              | Redford                | Michigan | 48239 |
| Prima Welding & Experim-<br>ental, Inc.  | 42.52 | -82.95 | Welding | Welding | 31000 Fraser Dr            | Fraser                 | Michigan | 48026 |
| Purvis and Foster, Inc.                  | 42.40 | -83.01 | Welding | Welding | 9640 Grinnell              | Detroit                | Michigan | 48213 |
| Quality Fab & Vent Inc                   | 42.41 | -83.15 | Welding | Welding | 8400 Puritan St            | Detroit                | Michigan | 48238 |
| Quality Welding & Fabrication            | 42.34 | -83.23 | Welding | Welding | 6358 Grandville Ave        | Detroit                | Michigan | 48228 |
| R & B Welding                            | 42.42 | -83.07 | Welding | Welding | 3415 E McNichols Rd        | Hamtramck              | Michigan | 48212 |
| Sams Welding                             | 42.34 | -83.17 | Welding | Welding | 6903 Hartwell St           | Dearborn               | Michigan | 48126 |
| Sav's Welding Services, Inc              | 42.28 | -83.14 | Welding | Welding | 11811 Pleasant St          | Detroit                | Michigan | 48217 |
| Smith                                    | 42.43 | -83.04 | Welding | Welding | 18508 Albany St            | Detroit                | Michigan | 48234 |
| Starlite Welding Inc                     | 42.37 | -83.28 | Welding | Welding | 12091 Woodbine Ave         | Redford Charter<br>Twp | Michigan | 48239 |
| Tipaloy Inc                              | 42.37 | -83.06 | Welding | Welding | 1435 E Milwaukee<br>Ave St | Detroit                | Michigan | 48211 |
| Weldtech                                 | 42.32 | -83.16 | Welding | Welding | 4401 Wyoming Ave           | Dearborn               | Michigan | 48126 |
| Willis fabrication and custom<br>welding | 42.38 | -83.17 | Welding | Welding | 13200 Grand River<br>Ave   | Detroit                | Michigan | 48227 |
